# Supplementary material for: ADTnorm: Robust Integration of Single-cell Protein Measurement across CITE-seq Datasets
Source: PubMed Central journal article supplement (PMC11261982; doi:10.21203/rs.3.rs-4572811/v1), 2024-07-08
Supplement: NIHPPrs4572811v1-supplement-1.pdf [file NIHPPrs4572811v1-supplement-1.pdf]

Supplementary Table 1: Public CITE-seq data summary

| Dataset             | Tissue            | URL                                                                                                                                                                                                                                                                                                                                                                                           |
|---------------------|-------------------|-----------------------------------------------------------------------------------------------------------------------------------------------------------------------------------------------------------------------------------------------------------------------------------------------------------------------------------------------------------------------------------------------|
| 10X_pbmc_10k        | PBMC              | <a href="https://support.10xgenomics.com/single-cell-gene-expression/datasets/3.0.0/pbmc_10k_protein_v3">https://support.10xgenomics.com/single-cell-gene-expression/datasets/3.0.0/pbmc_10k_protein_v3</a>                                                                                                                                                                                   |
| 10X_pbmc_1k         | PBMC              | <a href="https://www.10xgenomics.com/resources/datasets/1-k-pbm-cs-from-a-healthy-donor-gene-expression-and-cell-surface-protein-3-standard-3-0-0">https://www.10xgenomics.com/resources/datasets/1-k-pbm-cs-from-a-healthy-donor-gene-expression-and-cell-surface-protein-3-standard-3-0-0</a>                                                                                               |
| 10X_pbmc_5k_v3      | PBMC              | <a href="https://www.10xgenomics.com/datasets/5k-human-pbmcs-3-v3-1-chromium-controller-3-1-standard">https://www.10xgenomics.com/datasets/5k-human-pbmcs-3-v3-1-chromium-controller-3-1-standard</a>                                                                                                                                                                                         |
| 10X_pbmc_5k_nextgem | PBMC              | <a href="https://www.10xgenomics.com/resources/datasets/5-k-peripheral-blood-mononuclear-cells-pbm-cs-from-a-healthy-donor-with-cell-surface-proteins-next-gem-3-1-standard-3-1-0">https://www.10xgenomics.com/resources/datasets/5-k-peripheral-blood-mononuclear-cells-pbm-cs-from-a-healthy-donor-with-cell-surface-proteins-next-gem-3-1-standard-3-1-0</a>                               |
| 10X_malt_10k        | MALT              | <a href="https://www.10xgenomics.com/resources/datasets/10-k-cells-from-a-malt-tumor-gene-expression-and-cell-surface-protein-3-standard-3-0-0">https://www.10xgenomics.com/resources/datasets/10-k-cells-from-a-malt-tumor-gene-expression-and-cell-surface-protein-3-standard-3-0-0</a>                                                                                                     |
| stuart_2019         | Bone Marrow       | <a href="https://www.ncbi.nlm.nih.gov/geo/query/acc.cgi?acc=GSE128639">https://www.ncbi.nlm.nih.gov/geo/query/acc.cgi?acc=GSE128639</a>                                                                                                                                                                                                                                                       |
| granja_2019_bmmc    | Bone Marrow       | <a href="https://www.ncbi.nlm.nih.gov/geo/query/acc.cgi?acc=GSE139369">https://www.ncbi.nlm.nih.gov/geo/query/acc.cgi?acc=GSE139369</a>                                                                                                                                                                                                                                                       |
| granja_2019_pbmc    | PBMC              | <a href="https://www.ncbi.nlm.nih.gov/geo/query/acc.cgi?acc=GSE139369">https://www.ncbi.nlm.nih.gov/geo/query/acc.cgi?acc=GSE139369</a>                                                                                                                                                                                                                                                       |
| hao_2020            | PBMC              | <a href="https://atlas.fredhutch.org/nygc/multimodal-pbmc/">https://atlas.fredhutch.org/nygc/multimodal-pbmc/</a>                                                                                                                                                                                                                                                                             |
| kotliarov_2020      | PBMC              | <a href="https://nih.figshare.com/articles/dataset/CITE-seq_protein-mRNA_single_cell_data_from_high_and_low_vaccine_responders_to_reproduce_Figs_4-6_and_associated_Extended_Data_Figs_/11349761">https://nih.figshare.com/articles/dataset/CITE-seq_protein-mRNA_single_cell_data_from_high_and_low_vaccine_responders_to_reproduce_Figs_4-6_and_associated_Extended_Data_Figs_/11349761</a> |
| witkowski_2020      | Bone Marrow       | <a href="https://www.ncbi.nlm.nih.gov/geo/query/acc.cgi?acc=GSE153358">https://www.ncbi.nlm.nih.gov/geo/query/acc.cgi?acc=GSE153358</a>                                                                                                                                                                                                                                                       |
| triana_2021         | Bone Marrow       | <a href="https://figshare.com/projects/Single-cell_proteo-genomic_reference_maps_of_the_human_hematopoietic_system/94469">https://figshare.com/projects/Single-cell_proteo-genomic_reference_maps_of_the_human_hematopoietic_system/94469</a>                                                                                                                                                 |
| buus_2021_T         | Only keep T cells | <a href="https://figshare.com/collections/Improving_oligo-conjugated_antibody_signal_in_multimodal_single-cell_analysis/5018987">https://figshare.com/collections/Improving_oligo-conjugated_antibody_signal_in_multimodal_single-cell_analysis/5018987</a>                                                                                                                                   |
| Nettersheim_2022    | PBMC (Titration)  | <a href="https://www.ncbi.nlm.nih.gov/geo/query/acc.cgi?acc=GSE213282">https://www.ncbi.nlm.nih.gov/geo/query/acc.cgi?acc=GSE213282</a>                                                                                                                                                                                                                                                       |
| Stephenson_2021     | PBMC (COVID-19)   | <a href="https://www.ebi.ac.uk/biostudies/arrayexpress/studies/E-MTAB-10026">https://www.ebi.ac.uk/biostudies/arrayexpress/studies/E-MTAB-10026</a>                                                                                                                                                                                                                                           |

\*PBMC: Peripheral Blood Mononuclear Cells; MALT: Mucosa-Associated Lymphoid Tissue.

Supplementary Table 2: Manual gating strategy.

| Cell Type                                | Gating Strategy                                                                                                                                                      |
|------------------------------------------|----------------------------------------------------------------------------------------------------------------------------------------------------------------------|
| B                                        | CD3 <sup>-</sup> CD19 <sup>+</sup>                                                                                                                                   |
| CD4 T                                    | CD3 <sup>+</sup> CD19 <sup>-</sup> CD4 <sup>+</sup> CD8 <sup>-</sup>                                                                                                 |
| CD8 T                                    | CD3 <sup>+</sup> CD19 <sup>-</sup> CD4 <sup>-</sup> CD8 <sup>+</sup>                                                                                                 |
| DC                                       | CD3 <sup>-</sup> CD19 <sup>-</sup> CD20 <sup>-</sup> CD14 <sup>-</sup> HLA-DR <sup>+</sup> CD56 <sup>-</sup> CD16 <sup>-</sup>                                       |
| NK                                       | CD3 <sup>-</sup> CD19 <sup>-</sup> CD20 <sup>-</sup> CD14 <sup>-</sup> HLA-DR <sup>-</sup> CD56 <sup>+</sup>                                                         |
| Monocytes                                | CD3 <sup>-</sup> CD19 <sup>-</sup> CD20 <sup>-</sup> CD14 <sup>+</sup>                                                                                               |
| naïve B                                  | CD3 <sup>-</sup> CD19 <sup>+</sup> CD27 <sup>-</sup>                                                                                                                 |
| memory B                                 | CD3 <sup>-</sup> CD19 <sup>+</sup> CD27 <sup>+</sup>                                                                                                                 |
| naive CD4                                | CD3 <sup>+</sup> CD19 <sup>-</sup> CD4 <sup>+</sup> CD8 <sup>-</sup> CD25 <sup>-</sup> CD45RA <sup>+</sup> CD45RO <sup>-</sup>                                       |
| memory CD4                               | CD3 <sup>+</sup> CD19 <sup>-</sup> CD4 <sup>+</sup> CD8 <sup>-</sup> CD25 <sup>-</sup> CD45RA <sup>-</sup> CD45RO <sup>+</sup>                                       |
| Treg                                     | CD3 <sup>+</sup> CD19 <sup>-</sup> CD4 <sup>+</sup> CD8 <sup>-</sup> CD25 <sup>+</sup> CD127 <sup>-</sup>                                                            |
| naive CD8                                | CD3 <sup>+</sup> CD19 <sup>-</sup> CD4 <sup>-</sup> CD8 <sup>+</sup> CD45RA <sup>+</sup> CD45RO <sup>-</sup>                                                         |
| memory CD8                               | CD3 <sup>+</sup> CD19 <sup>-</sup> CD4 <sup>-</sup> CD8 <sup>+</sup> CD45RA <sup>-</sup> CD45RO <sup>+</sup>                                                         |
| plasmacytoid DC                          | CD3 <sup>-</sup> CD19 <sup>-</sup> CD20 <sup>-</sup> CD14 <sup>-</sup> HLA-DR <sup>+</sup> CD56 <sup>-</sup> CD16 <sup>-</sup> CD123 <sup>+</sup> CD11c <sup>-</sup> |
| myeloid DC                               | CD3 <sup>-</sup> CD19 <sup>-</sup> CD20 <sup>-</sup> CD14 <sup>-</sup> HLA-DR <sup>+</sup> CD56 <sup>-</sup> CD16 <sup>-</sup> CD123 <sup>-</sup> CD11c <sup>+</sup> |
| CD16 <sup>+</sup> NK                     | CD3 <sup>-</sup> CD19 <sup>-</sup> CD20 <sup>-</sup> CD14 <sup>-</sup> HLA-DR <sup>-</sup> CD56 <sup>+</sup> CD16 <sup>+</sup>                                       |
| CD16 <sup>-</sup> NK                     | CD3 <sup>-</sup> CD19 <sup>-</sup> CD20 <sup>-</sup> CD14 <sup>-</sup> HLA-DR <sup>-</sup> CD56 <sup>+</sup> CD16 <sup>-</sup>                                       |
| classical monocyte                       | CD3 <sup>-</sup> CD19 <sup>-</sup> CD20 <sup>-</sup> CD14 <sup>+</sup> CD16 <sup>-</sup>                                                                             |
| intermediate monocyte                    | CD3 <sup>-</sup> CD19 <sup>-</sup> CD20 <sup>-</sup> CD14 <sup>+</sup> CD16 <sup>+</sup>                                                                             |
| non-classical CD16 <sup>+</sup> monocyte | CD3 <sup>-</sup> CD19 <sup>-</sup> CD20 <sup>-</sup> CD14 <sup>-</sup> HLA-DR <sup>+</sup> CD56 <sup>-</sup> CD16 <sup>+</sup>                                       |
